# Supplementary material
Source: PubMed Central journal article supplement (PMC2631436)
Supplement: NIHMS62110-supplement-si20061108_115.pdf [file NIHMS62110-supplement-si20061108_115.pdf]

Supplemental Table 1. Oligonucleotides used in site-directed mutagenesis for MjPurO. Only the sense primers are shown. Introduced restriction sites are underlined, and sequence differences with wild-type are shown in bold.

| Oligonucleotide sequences 5' → 3'                                              | Restriction site | Amino acid substitution |
|--------------------------------------------------------------------------------|------------------|-------------------------|
| C TCA AGT <b>AGG</b> <u>AGC</u> <u>TTT</u> CCA AAC <b>AAA</b> GAG<br>GCA AAG A | <i>Hind III</i>  | R31K                    |
| C CCA TAT ATC ACA <b>TTC</b> <u>AAC</u> <u>TGC</u> ATA AAG GTT<br>ATT G        | <i>Mfe I</i>     | Y59F                    |
| C CCA TAT ATC ACA TAC <u>AAT</u> <b>GCC</b> ATA AAG GTT<br>ATT G               | <i>Mfe I</i>     | C61A                    |
| TT ATG GAC TAT <b>CAA</b> AAA GAT GAT <u>TAC</u> <u>AAG</u><br>ACC CCA AG      | <i>Psi I</i>     | E102Q                   |
